# 1 **Rosin Soap Exhibits Virucidal Activity**

2

3 Stephen H Bell<sup>1</sup>, Derek J Fairley<sup>2</sup>, Hannele Kettunen<sup>3</sup>, Juhani Vuorenmaa<sup>3</sup>, Juha  
4 Orte<sup>4</sup>, Connor G G Bamford<sup>5</sup>, John W McGrath<sup>1#</sup>

5

6 <sup>1</sup> School of Biological Sciences, Queen's University Belfast, Belfast, UK.

7 <sup>2</sup> Regional Virology Unit. Royal Victoria Hospital, Belfast. Belfast Trust. UK.

8 <sup>3</sup> Hankkija Oy, Peltokuumolantie 4, FI-05801 Hyvinkää, Finland

9 <sup>4</sup> Forchem Oy, Maanpäätie 3, FI-26820 Rauma

10 <sup>5</sup> Wellcome-Wolfson Institute for Experimental Medicine, Queen's University Belfast,  
11 Belfast, UK.

12

13 # corresponding author: [j.mcgrath@qub.ac.uk](mailto:j.mcgrath@qub.ac.uk)

14

## 15 **Abstract**

16

17 Chemical methods of virus inactivation are used routinely to prevent viral  
18 transmission in both a personal hygiene capacity but also in at-risk environments like  
19 hospitals. Several 'virucidal' products exist, including hand soaps, gels and surface  
20 disinfectants. Resin acids, which can be derived from Tall oil produced from trees,  
21 have been shown to exhibit anti-bacterial activity. However, whether these products  
22 or their derivatives have virucidal activity is unknown. Here, we assessed the  
23 capacity of Rosin soap to inactivate a panel of pathogenic mammalian viruses in  
24 vitro. We show that Rosin soap can inactivate the human enveloped viruses:  
25 influenza A virus (IAV), respiratory syncytial virus and severe acute respiratory  
26 syndrome coronavirus 2 (SARS-CoV-2). For IAV, rosin soap could provide a  
27 100,000-fold reduction in infectivity. However, Rosin soap failed to affect the non-  
28 enveloped encephalomyocarditis virus (EMCV). The inhibitory effect of Rosin soap  
29 against IAV infectivity was dependent on its concentration but not dependent on  
30 incubation time nor temperature. Together, we demonstrate a novel chemical  
31 inactivation method against enveloped viruses, which could be of use in preventing  
32 virus infections in certain settings.

33

## 34 **Importance**

35

36 Viruses remain a significant cause of human disease and death, most notably  
37 illustrated through the current Covid-19 pandemic. Control of virus infection  
38 continues to pose a significant global health challenge to the human population.  
39 Viruses can spread through multiple routes, including via environmental and surface  
40 contamination where viruses can remain infectious for days. Methods to inactivate  
41 viruses on such surfaces may help mitigate infection. Here we present evidence  
42 identifying a novel 'virucidal' product in Rosin soap, which is produced from Tall oil  
43 from coniferous trees. Rosin soap was able to rapidly and potently inactivate  
44 influenza virus and other enveloped viruses.

## 45 **Introduction**

46

47 Even before the current pandemic of SARS-CoV-2, the virus that causes coronavirus  
48 disease 19 (Covid-19), respiratory-borne viruses were a leading cause of global  
49 morbidity and mortality (Institute for Health Metrics and Evaluation 2019). By way of  
50 an example, viruses such as influenza viruses (which includes IAV), are responsible  
51 for hundreds of thousands of deaths annually (Iuliano et al., 2018). To date, the  
52 pandemic of SARS-CoV-2 claimed the lives of over 3.5 million people and >180  
53 million cases have been reported worldwide (World Health Organisation (WHO),  
54 2021). Strategies to treat and control the spread of viruses, such as antiviral  
55 therapies and vaccines, are employed to protect the health and well-being of the  
56 general population in particular for those in at-risk settings, such as in hospital care  
57 and in the care sector (Kanamori et al., 2020). Pathogenic respiratory viruses may  
58 spread directly from person-to-person via small droplets or aerosols as well as direct  
59 contact with each other and from contaminated surfaces or fomites (Leung, 2021).  
60 Furthermore, aerosolization of environmentally-contaminated infectious virus has  
61 been observed and can spread disease (Asadi et al., 2020 and Greenhalgh et al.,  
62 2021). Infectious SARS-CoV-2 has been shown to persist on surfaces such as metal  
63 and plastic for up to 3 days respectively (van Doremalen et al., 2020). An additional  
64 layer of defence against infectious agents like viruses is the destruction of their  
65 survival on surfaces.

66

67 The infectious particle of many respiratory viruses is encased in a phospholipid  
68 bilayer or 'envelope', which is essential for infectivity (Cohen, 2016). For infection,  
69 enveloped viruses fuse their lipid envelope with the outer membrane, whether that is  
70 the plasma membrane or from vesicles, of the target host cell. Enveloped viruses  
71 include but are not limited to: influenza viruses, CoVs, paramyxoviruses and  
72 pneumonviruses. By comparison, non-enveloped viruses include adenoviruses and  
73 picornaviruses, such as rhinovirus and EMCV. A range of virus inactivation methods  
74 exist that can reduce the likelihood of survival or transmission of viruses via direct  
75 contact or fomites by disrupting the lipid membrane of enveloped viruses (Chaudhary  
76 et al., 2020). Such virucidal products include those targeted for personal hygiene use  
77 such as soaps or hand-gels that can be targeted to high-touch surfaces like the

78 hands (Chaudhary et al., 2020; Chin et al., 2020). Additional measures are those  
79 that target the environment, such as surface disinfectants (Rabenau et al., 2005;  
80 Fathizadeh et al., 2020; WHO, 2020).

81

82 During a pandemic there is likely to be an increased demand for products that  
83 eliminate viral infectivity from surfaces. Coniferous trees and some other plants  
84 produce liquid resin which seals wounds in tree bark and protects the plant against  
85 pathogens and herbivores. Coniferous rosin contains resin acids, such as abietic and  
86 dehydroabietic acid, which are lipid-soluble diterpenoid carboxylic acids (San  
87 Feliciano et al., 1993). Resin acids have been shown to have antibacterial properties  
88 especially against Gram-positive bacteria (Söderberg et al., 1990; Savluchinske-Feio  
89 et al. 2006). Rosin can be collected from naturally occurring trees, but a  
90 commercially more important source of resin acids is crude tall oil, a side-stream of  
91 the cellulose processing industry. Here, we aimed to determine whether Rosin soap  
92 exhibited virucidal activity against clinically relevant pathogenic human viruses.  
93 Viruses used in this study include the enveloped viruses, IAV, RSV, SARS-CoV-2  
94 and EMCV. Initially, 2.5% rosin soap was evaluated for its virucidal activity for all  
95 enveloped viruses examined using liquid phase assays under standardised  
96 laboratory conditions. Here, we demonstrate the potent virucidal activity of rosin  
97 soap against pathogenic enveloped viruses, supporting its further development as a  
98 surface disinfectant.

99

## 100 **Materials and Methods**

101

### 102 **Cell culture**

103 Mammalian cell lines (MDCK; Madin-Darby Canine Kidney, and Vero African Green  
104 Monkey cells) were cultured in DMEM (high glucose) supplemented with foetal  
105 bovine serum (v/v 5%) and penicillin/streptomycin (v/v 1%). Cell cultures were  
106 maintained in flasks (T175cm<sup>2</sup>) and passaged routinely.

107

### 108 **Viruses**

109 Stocks of representative viral strains, including influenza A virus (Udorn, WSN),  
110 respiratory syncytial virus (RSV-A2), SARS-CoV-2, and encephalomyocarditis virus  
111 (EMCV)) were prepared using standard virology techniques on Vero (SARS-CoV-2  
112 and EMCV), MDCK (influenza A virus) and Hep-2 (RSV) cells. For culture of IAV-  
113 Udorn, serum free media was used supplemented with TPCK-treated trypsin (Sigma  
114 Aldrich) at a concentration of 1ug/ml. Infectious stocks were produced and titrated in  
115 their respective cell lines before use in virucidal activity experiments. All virus work  
116 was carried out in the Biological Safety Level (BSL) 2 or BSL3 (SARS-CoV-2)  
117 facilities at QUB.

118

### 119 **Tall oil**

120 The Rosin soap was produced from crude Tall Oil by Forchem Ltd (Rauma, Finland).  
121 It was a water solution obtained from dried Rosin salt consisting less than 10%  
122 sodium salts of Tall Oil fatty acids and over 90% sodium salts of resin acids. The  
123 resin acids and fatty acids of the product originated from the coniferous trees *Pinus*  
124 *sylvestris* L. and *Picea abies* L. The most abundant resin acid types include abietic  
125 acid, dehydroabietic acid, pimaric acid and palustris acid.

126

### 127 **Inactivation protocol**

128 Virus inactivation assays were carried out in 96 well plates. Initially complete DMEM  
129 (100 µl) was added to each well, except the first column, which was used to  
130 incubate virus and product. Three concentrations of rosin soap powder were tested  
131 in each condition in duplicate (2.5%, 0.25% and 0.025% w/v). Rosin soap (Forchem  
132 Ltd (Rauma, Finland)) was dissolved in ddH<sub>2</sub>O. The negative control contains no

133 virus and was incubated at 37°C. To each well of the first column, 100 µl of treatment  
134 and 100ul of virus was added. After exposure to experimental conditions, which were  
135 time (5, 15 or 10 min) and temperature (4°C, room temperature and 37°C), tenfold  
136 serial dilutions were carried out. Following dilution of the virus, permissive cells were  
137 added (100 µl) and incubated for 2-3 days. Viral infectivity was measured as the  
138 reciprocal of the final dilution giving cytopathic effect following manual investigation  
139 with a light microscope.

140

#### 141 **Filtration**

142 To remove residual Rosin soap from the treated virus inoculum and hence lower the  
143 level of cytotoxicity of the treatment when measuring infectivity of virus preparations,  
144 Amicon® Ultra-15 Centrifugal Filter Units (Merck) were used. 100 µl of virus (WSN)  
145 was added to 100µl of Rosin soap (2.5%) for 5 minutes at room temperature. The  
146 200µl (WSN/Rosin Soap Powder) was washed through the filter units four times with  
147 12ml fresh DMEM (supplemented with fetal bovine serum (v/v 5%) and  
148 penicillin/streptomycin (v/v 1%). 10-fold serial dilutions are carried out. Following  
149 dilution of the virus, permissive cells were added (100µl) and incubated for between  
150 2-3 days. Viral infectivity was measured as the reciprocal of the final dilution giving  
151 cytopathic effect.

152

153

154 **Results**

155

156 **Rosin Soap reduces the infectivity of influenza virus**

157

158 Novel solutions to disrupt the transmission of human pathogens are required. Given  
159 that they exhibit antibacterial activity we hypothesized that Rosin soap may inhibit  
160 the transmission of pathogenic human viruses by killing viruses on surfaces. We thus  
161 took Rosin Soap and assessed whether it could reduce the infectivity of IAV (WSN  
162 strain). We chose IAV because it is a model enveloped human RNA virus and is a  
163 significant human pathogen. Furthermore, IAV achieves high titres during  
164 propagation in cell culture and is highly cytopathic (rapid cell death and rounding) in  
165 traditionally used cell lines such as MDCK cells, which together allow the facile and  
166 sensitivity determination of high levels of inhibition to viral infectivity. To determine  
167 whether Rosin Soap Powder could reduce the infectivity of IAV, we incubated  
168 influenza virus stocks with rosin acid (2.5% w/v) at 37°C for 30 minutes and  
169 measured residual infectivity by limiting dilution and assessment of cytopathic effect  
170 72hrs later, in comparison to virus and DMEM only controls respectively. In these  
171 initial experiments, incubation of IAV with Rosin Soap Powder gave at least a ten-  
172 thousand-fold reduction in infectivity (**Fig 1**).

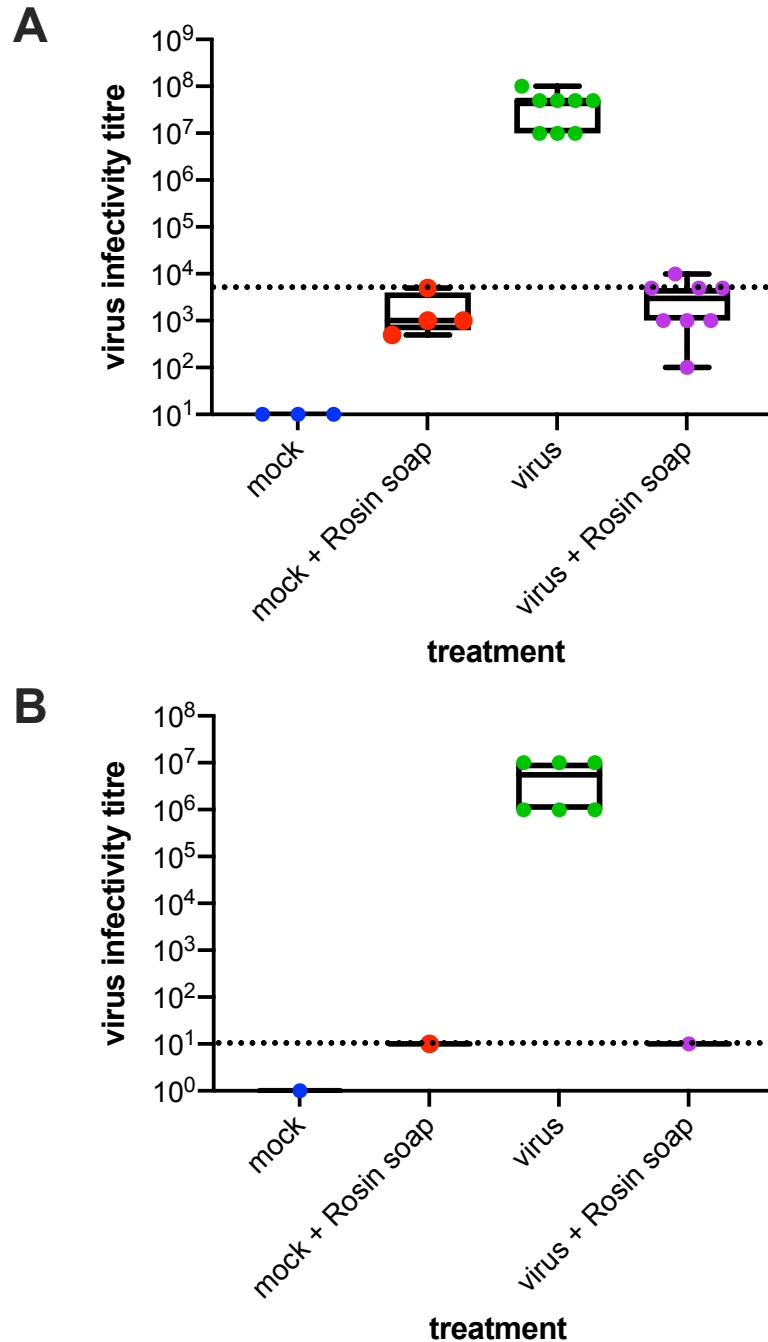

173

174 **Fig 1. Effect of Rosin soap treatment on IAV (WSN strain) infectivity in solution compared to**

175 **mock (DMEM) without (A) and with removal of residual Rosin Acid by filtration (B). IAV**

176 suspension was incubated with Rosin soap solution at 37 °C for 5 minutes before residual infectivity

177 was determined via dilution on susceptible cells (MDCK cells). Infectious virus titre corresponds to the

178 reciprocal of the final dilution giving virus-induced cytopathic effect. Background (dashed lines)

179 delineates the dilution that the Rosin soap treatment was toxic to the MDCK cells.

180

181

182



183 Precluding a precise determination of reduction in infectivity is the relatively high limit  
184 of detection in this assay due to the cytotoxic effect of residual Rosin Soap on cell  
185 viability, which is necessary for detection of IAV infectivity. Throughout our studies  
186 we were hindered by the relatively high cytotoxicity of rosin acids at the maximum  
187 concentration on the cells used to measure residual viral infection. This relatively  
188 high limit of detection prohibited us from determining whether there existed any viral  
189 infectivity remaining. To decrease the cytopathic effect and thus reduce the  
190 background, we filter purified our virus/rosin acid preparations prior to infectivity  
191 measurements. Experimental conditions were room temperature for 5 minutes.  
192 These experiments demonstrated a removal of the background cytotoxicity and  
193 lower limit of detection: Enhanced virucidal activity against IAV (1000000-fold) was  
194 observed (i.e only 0.00001% remaining). These data suggest that Rosin soap very  
195 likely can inactivate all infectious virus particles in each sample at 2.5%, although we  
196 cannot formally prove this.

197

### 198 **Assessment of the virucidal breadth of Rosin Soap**

199

200 Given its effect on IAV infectivity, we hypothesized that Rosin Soap may also inhibit  
201 other viruses. To this end we investigated the virucidal activity of rosin soap against  
202 another IAV strain (H3N2, Udorn), RSV and SARS-CoV-2, as well as the non-  
203 enveloped encephalomyocarditis virus (EMCV). RSV and SARS-CoV-2 are  
204 representatives from two groups of viruses, the pneumoviruses and the  
205 coronaviruses and are themselves significant human pathogens. EMCV is a model  
206 non-enveloped virus and a pathogen of pigs and other mammals, such as non-  
207 human primates. We carried out the same protocol as above used for IAV WSN and  
208 measured residual viral infectivity using virus specific-specific means. Conditions for  
209 these experiments were room temperature for 5 minutes. In this series of  
210 experiments, all enveloped viruses were inhibited by Rosin Soap although to  
211 different degrees demonstrating that the activity of rosin soap is not limited to WSN  
212 nor IAV (**Fig 2**). In all cases, treatment with Rosin Soap brought infectivity down to  
213 baseline and fold inactivation was thus highly dependent on the starting  
214 concentration (e.g. greatest for Udorn and lowest for SARS-CoV-2). However,  
215 essentially all infectivity was brought to below the limit of detection, which is highly  
216 suggestive of near-complete inhibition of infectivity (see previous experiment).

217 Interestingly, neither rosin soap nor Triton X (data not shown) inhibited the non-  
218 enveloped EMCV. The susceptibility of enveloped viruses to Rosin acids (and not  
219 the non-enveloped virus) suggests that the viral lipid membrane is a major target of  
220 inactivation.  
221

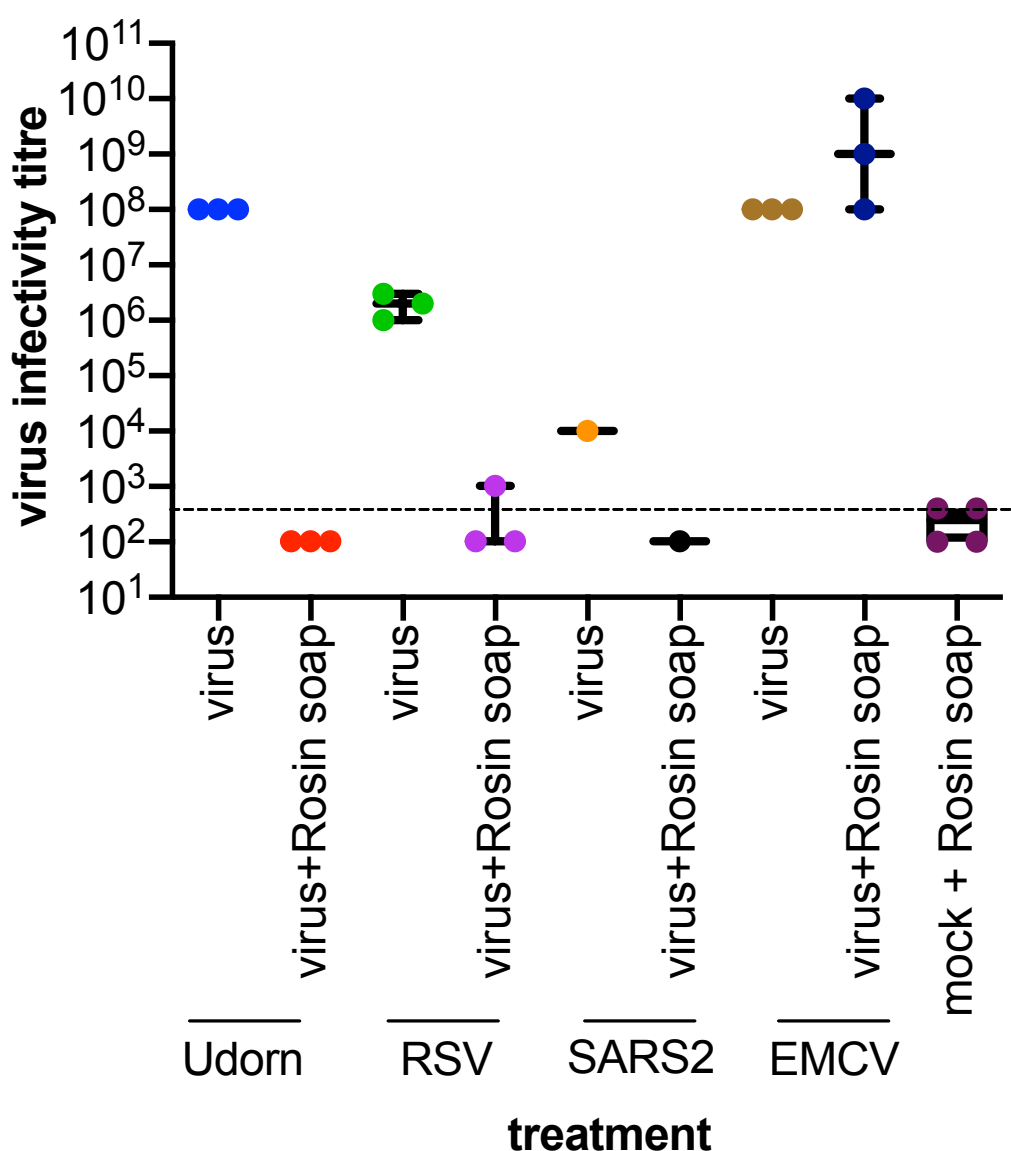

222  
223 **Fig 2. Effect of Rosin soap treatment on a panel of virus infectivity in solution compared to**  
224 **mock (DMEM).** Three enveloped (IAV Udorn strain; RSV and SARS-CoV-2 [SARS2]) and one non-  
225 enveloped (EMCV) virus were used. Virus suspensions were incubated with Rosin Acid solution at 37  
226 °C for 5 minutes before residual infectivity was determined via dilution on susceptible cells (MDCK  
227 cells for IAV, Vero cells for RSV, S2 and EMCV). Infectious virus titre corresponds to the reciprocal of  
228 the final dilution giving virus-induced cytopathic effect. Background (dashed lines) delineates the  
229 dilution that the Rosin soap treatment was toxic to the susceptible cells.

230

231

232

233

### 234 **Virucidal activity of Rosin soap is dependent on concentration**

235

236 To understand more about the physiochemical dependence of rosin soap exhibited  
237 potent activity against enveloped viruses like IAV, RSV and SARS-CoV-2, we next  
238 determined the effect of Rosin Soap concentration, temperature and incubation time  
239 on its virucidal activity. All previous experiments were carried out with a  
240 concentration of 2.5% (w/v), time of 5 minutes and at room temperature so here we  
241 decided to alter the concentration (2.5, 0.25 and 0.025%) together with incubation  
242 time (5, 15 and 30 mins) and incubation temperature (37 °C, room temperature or 4  
243 °C). Across all experiments, virucidal activity of Rosin Soap was only dependent on  
244 the concentration, with 2.5% showing seemingly complete activity against IAV and  
245 reduction in inhibition observed for each reduction in concentration (**Fig 3A**). In  
246 contrast to concentration, virucidal activity was independent of incubation  
247 temperature (4, room temperature [RT] or 37 °C) and incubation time with there  
248 being little difference between a 5-minute incubation compared to a 30-minute  
249 incubation (**Fig 3A-C**). These data demonstrate the rapid and efficacious activity of  
250 Rosin Acids against the enveloped virus IAV only when a critical concentration  
251 threshold has been reached.

252

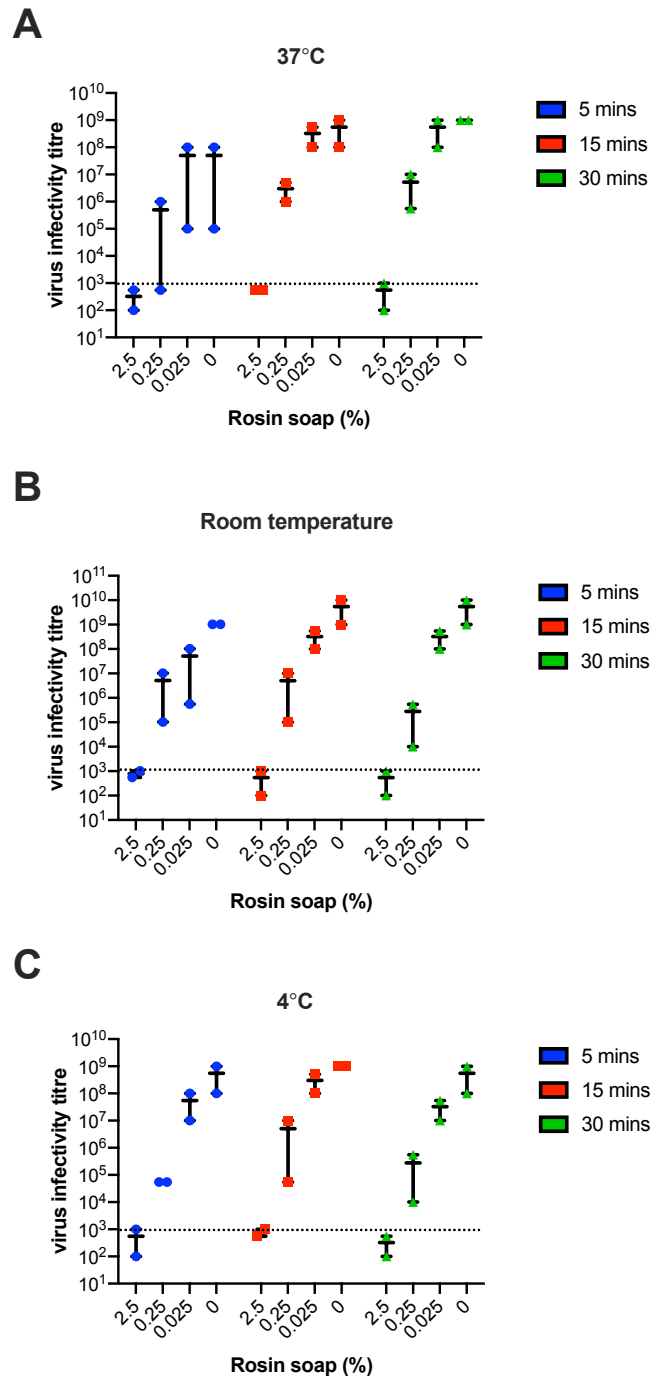

253

254 **Fig 3. Effect of Rosin soap treatment on a IAV infectivity in solution compared to mock**  
255 **(DMEM) at different concentrations, treatment times and temperatures.** IAV suspensions were  
256 incubated with Rosin soap solution (final concentration: 2.5, 0.25 or 0.025%) under distinct conditions  
257 before residual infectivity was determined via dilution on susceptible cells (MDCK). The effect of  
258 temperature: 37 °C (A), room temperature (B) or 4 °C (C) is shown alongside incubation time: 5 (blue),  
259 15 (red) and 30 minutes (green). Infectious virus titre corresponds to the reciprocal of the final dilution  
260 giving virus-induced cytopathic effect. These experiments were carried out in three replicates in two  
261 independent experiments.

262

## 263 Discussion

264

265 Infectious pathogenic human viruses, including SARS-CoV-2, can persist in the  
266 environment for extended periods of time, facilitating transmission via direct contact  
267 and/or through environment contamination (Marquès et al., 2020). Strategies to  
268 eliminate such infectivity from such inanimate and animate surfaces is required.  
269 Exploration of strategies that are of natural origin are warranted. To this end we  
270 sought to investigate whether Rosin soap has antiviral activity due to its reported  
271 antibacterial activity (Söderberg et al., 1990). Our work presented here shows that  
272 Rosin soap also exhibited rapid and potent virucidal activity against pathogenic  
273 human enveloped viruses but was not effective against a prototypic non-enveloped  
274 virus, EMCV.

275

276 Critically, we investigated the limits of Rosin soap virucidal activity by altering  
277 temperature, concentration and time of incubation. Using IAV as a model enveloped  
278 virus, this virucidal effect was dependent on concentration of product rather than  
279 incubation temperature or time. Interestingly, while virucidal activity of Rosin soap  
280 was not influenced by length of exposure (5 to 30 minutes) or incubation temperature  
281 (4°C, room temperature and 37°C), the only factor that did influence virucidal activity  
282 was Rosin soap concentrations with 2.5% (w/v) being the most effective. Higher  
283 concentrations of Rosin soap led to the rapid and potent loss of infectivity of IAV and  
284 other enveloped viruses. The fact that temperature nor time had a major impact of  
285 efficacy suggests that this product has highly potent virucidal activity.

286

287 Mechanistically, our results showing the lack of efficacy against non-enveloped  
288 viruses suggests that the target for Rosin soap antiviral activity is the viral envelope,  
289 which is composed of a phospholipid bilayer. The virus envelope is critically required  
290 for infectivity facilitating protection of genomic material and facile entry (catalysed by  
291 viral fusion protein machinery) into target host cells via virion-to-cell membrane  
292 fusion either at the plasma membrane or endosomal compartment membranes  
293 (Dimitrov 2004). Loss of virion envelope integrity will prevent entry and release of  
294 infectious virus genomes into host cells, likely making this responsible for the  
295 virucidal activity observed herein. How Rosin soap might disrupt the envelope is

296 unknown, but Rosin soaps likely act as surfactants and further studies are required  
297 to determine this. Precisely how Rosin soap impacts the viral envelope is not known  
298 at this stage. Rosin soap is a mix of products, and that it would be useful to look at  
299 the individual compounds – both in terms of the resin acids and the carboxylic acids.  
300 However, there is limited commercial availability of these, and they also have limited  
301 solubility in pure solution. As has been done for other virucidal products (Fletcher et  
302 al., 2020).

303

304 Unfortunately, due to the cytotoxic nature of Rosin soap at high concentrations (from  
305 0.25% to ~0.0025%) in our in vitro cell line cell culture conditions, we were not able  
306 to completely negate this background toxicity in our virus infectivity assays (which  
307 rely upon cellular integrity) even following purification of our virus/soap mixes by  
308 filtration. However, our data suggest that it is highly likely that Rosin soap inactivates  
309 the vast majority of infectious particles in a given prep. Using IAV, which grows to  
310 very high titres, we were able to demonstrate nearly complete inactivation. It is worth  
311 noting that this level of virus titre used in these experiments is higher than likely  
312 present in most 'real world' scenarios/environments (Boone and Gerba 2007).

313 Despite our observation of toxicity in cell culture conditions, Rosin salves have been  
314 found to be safe and effective in wound care (Jokinen and Sipponen 2016).

315

316 The viricidal activity of Rosin soap when viruses are dried onto surfaces is an area  
317 that needs further research as viruses such as SARS-CoV-2 persist on surfaces and  
318 are a source of infection transmission (Kampf et al., 2020). This would determine if  
319 Rosin soap can be formulated into products that could be used as a commercial  
320 surface disinfectant for premises including hospitals. A wider variety of viruses could  
321 also be examined to determine if Rosin soap exhibits the same viricidal activity  
322 against most or all enveloped viruses such as SARS-CoV-2. Rosin soap did not  
323 inhibit the non-enveloped virus, EMCV. Other non-enveloped viruses, such as  
324 rhinoviruses or noroviruses could be examined to determine if it is only EMCV that  
325 rosin soap does not inhibit.

326

327 In conclusion, we demonstrate the virucidal activity of rosin soap against multiple  
328 pathogenic human enveloped viruses.

329

330

331 **References**

332

333 Asadi, S., Bouvier, N., Wexler, A.S. and Ristenpart, W.D., 2020. The coronavirus  
334 pandemic and aerosols: Does COVID-19 transmit via expiratory particles? *Aerosol*  
335 *Science and Technology*. 635-638.

336

337 Boone, S. A. and Gerba, C. P. 2007. Significance of Fomites in the Spread of  
338 Respiratory and Enteric Viral Disease. *Appl Environ Microbiol*. 73(6): 1687–1696.

339

340 Cohen, F.S., 2016. How viruses invade cells. *Biophysical journal*, 110(5), pp.1028-  
341 1032.

342

343 Chin, A.W., Chu, J.T., Perera, M.R., Hui, K.P., Yen, H.L., Chan, M.C., Peiris, M. and  
344 Poon, L.L., 2020. Stability of SARS-CoV-2 in different environmental conditions. *The*  
345 *Lancet Microbe*, 1(1), p.e10.

346

347 Chaudhary, N.K., Chaudhary, N., Dahal, M., Guragain, B., Rai, S., Chaudhary, R.,  
348 Sachin, K., Lamichhane-Khadka, R. and Bhattarai, A., 2020. Fighting the SARS CoV-  
349 2 (COVID-19) pandemic with soap. Preprints 2020050060

350

351 Dimitrov, D. S., 2004. Virus entry: molecular mechanisms and biomedical applications.  
352 *Nature Reviews Microbiology*. (2) pp. 109–122.

353

354 Fathizadeh, H., Maroufi, P., Momen-Heravi, M., Dao, S., Ganbarov, K., Pagliano, P.,  
355 Esposito, S. and Kafil, H.S., 2020. Protection and disinfection policies against SARS-  
356 CoV-2 (COVID-19). *Le infezioni in medicina*, 28(2), pp.185-191.

357

358 Fletcher, N. F., Meredith, L. W., Tidswell, E. L., Bryden, S. R., Goncalves-Carneiro,  
359 D., Chaudhry, Y., Shannon-Lowe, C., Folan, M. A., Lefteri, D. A., Pinggen, M., Bailey,  
360 D., McKimmie, C. S. and Baird., A. W. 2020. A novel antiviral formulation inhibits a  
361 range of enveloped viruses. *J Gen Virol*. 101(10):1090-1102.

362

363 Greenhalgh, T., Jimenez, J.L., Prather, K.A., Tufekci, Z., Fisman, D. and Schooley,  
364 R., 2021. Ten scientific reasons in support of airborne transmission of SARS-CoV-  
365 2. *The Lancet*, 397(10285), pp.1603-1605.

366

367 Iuliano, A.D., Roguski, K.M., Chang, H.H., Muscatello, D.J., Palekar, R., Tempia, S.,  
368 Cohen, C., Gran, J.M., Schanzer, D., Cowling, B.J. and Wu, P., 2018. Estimates of  
369 global seasonal influenza-associated respiratory mortality: a modelling study. *The*  
370 *Lancet*, 391(10127), pp.1285-1300.

371

372 Institute for Health Metrics and Evaluation (IHME). Global Burden of Disease Study  
373 2019 (GBD 2019) Data Resources | GHDx. Available at:  
374 <http://ghdx.healthdata.org/gbd-2019>

375

376 Jokinen, J. J. and Sipponen, A. 2016. Refined Spruce Resin to Treat Chronic Wounds:  
377 Rebirth of an Old Folkloristic Therapy. *Adv Wound Care (New Rochelle)*. 1; 5(5): 198–  
378 207.

379



380 Kanamori, H., Weber, D.J. and Rutala, W.A., 2021. The role of the healthcare surface  
381 environment in SARS-CoV-2 transmission and potential control measures. *Clinical*  
382 *Infectious Diseases*. 72(11), pp. 2052–2061.

383  
384 Kampf, G., Todt, D., Pfaender, S. and Steinmann, E., 2020. Persistence of  
385 coronaviruses on inanimate surfaces and their inactivation with biocidal  
386 agents. *Journal of Hospital Infection*. 104(3), pp.246-251.

387  
388 Leung, K., Shum, M.H., Leung, G.M., Lam, T.T. and Wu, J.T., 2021. Early  
389 transmissibility assessment of the N501Y mutant strains of SARS-CoV-2 in the United  
390 Kingdom, October to November 2020. *Eurosurveillance*, 26(1), p.2002106.

391  
392 Marquès, M. and Domingo, J.L., 2020. Contamination of inert surfaces by SARS-CoV-  
393 2: Persistence, stability and infectivity. A review. *Environmental Research*, p.110559.

394  
395 Rabenau, H.F., Kampf, G., Cinatl, J. and Doerr, H.W., 2005. Efficacy of various  
396 disinfectants against SARS coronavirus. *Journal of Hospital Infection*, 61(2), pp.107-  
397 111.

398  
399 Söderberg, T.A., Gref, R., Holm, S., Elmros, T. and Hallmans, G., 1990. Antibacterial  
400 activity of rosin and resin acids in vitro. *Scandinavian Journal of Plastic and*  
401 *Reconstructive Surgery and Hand surgery*, 24(3), pp.199-205.

402  
403 Savluchinske-Feio, S., Curto, M.J.M., Gigante, B. and Roseiro, J.C., 2006.  
404 Antimicrobial activity of resin acid derivatives. *Applied microbiology and*  
405 *Biotechnology*, 72(3), pp.430-436.

406  
407 San Feliciano, A., Gordaliza, M., Salinero, M.A. and del Corral, J.M.M., 1993. Abietane  
408 acids: sources, biological activities, and therapeutic uses. *Planta medica*, 59(06),  
409 pp.485-490.

410  
411 van Doremalen, N., Bushmaker, T., Morris, D.H., Holbrook, M.G., Gamble, A.,  
412 Williamson, B.N., Tamin, A., Harcourt, J.L., Thornburg, N.J., Gerber, S.I. and Lloyd-  
413 Smith, J.O., 2020. Aerosol and surface stability of HCoV-19 (SARS-CoV-2) compared  
414 to SARS-CoV-1. *N Engl J Med*. 382(16):1564-1567.

415  
416 World Health Organization. 2021. WHO COVID-19 Dashboard. [online]  
417 covid19.who.int. Available at: <https://covid19.who.int>.

418  
419 World Health Organization. 2020. Coronavirus disease (COVID-19): Cleaning and  
420 disinfecting surfaces in non-health care settings. Available at:  
421 [https://www.who.int/news-room/q-a-detail/coronavirus-disease-covid-19-cleaning-](https://www.who.int/news-room/q-a-detail/coronavirus-disease-covid-19-cleaning-and-disinfecting-surfaces-in-non-health-care-settings)  
422 [and-disinfecting-surfaces-in-non-health-care-settings](https://www.who.int/news-room/q-a-detail/coronavirus-disease-covid-19-cleaning-and-disinfecting-surfaces-in-non-health-care-settings).

423  
424  
425  
426



427 **Acknowledgements**

428 The authors wish to thank Dr Ed Hutchinson (CVR), and Prof Ultan Power (QUB) for  
429 access to IAV and RSV, respectively. This work was funded by support from  
430 Hankkija Oy and Forchem Oy.

431

432

433

434

435

436

437

438

439
